# Supplementary material for: Three-dimensional biotemplate-loaded nickel sulfide vacancies engineered to promote the absorption of electromagnetic waves
Source: Royal Society of Chemistry journal article supplement (doi:10.1039/d3nr05275c), 2023-11-28
Supplement: d3nr05275c1.pdf [file d3nr05275c1.pdf]

## Supporting Information

### Three-dimensional biotemplate-loaded nickel sulfide vacancies engineered to promote electromagnetic wave absorption

Wenrui Zhu<sup>1a</sup>, Dashuang Wang<sup>1a</sup>, Zhilan Du<sup>a</sup>, Yan Liao<sup>a</sup>, Kai Zhang<sup>c</sup>, Shuai Xie<sup>d</sup>,  
Wenxin Dong<sup>e</sup>, Jinsong Rao<sup>a</sup>, Yuxin Zhang<sup>\*a</sup>, Xiaoyin Liu<sup>\*b</sup>

<sup>a</sup> *College of Materials Science and Engineering, Chongqing University, Chongqing, 400044, China*

<sup>b</sup> *Army Logistics Academy of PLA, Chongqing, 401331, China*

<sup>c</sup> *Research Institute of Agricultural Engineering, Chongqing Academy of Agricultural Sciences, Chongqing, 401329, China*

<sup>d</sup> *State Key Laboratory of Green Building Materials, China Building Materials Academy, Beijing 100024, China*

<sup>e</sup> *School of Resources and Safety Engineering, Chongqing University, Chongqing, China*

#### Corresponding author:

E-mail: Yuxin Zhang: zhangyuxin@cqu.edu.cn Xiaoyin Liu: lxy\_ctbu@163.com

1: These authors contributed equally to this work.

## Supporting Information

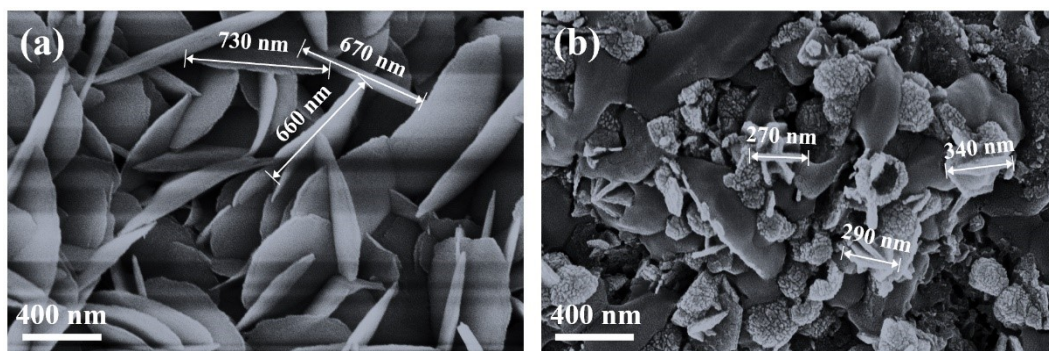

**Figure S1.** SEM images of (a)  $\text{Ni(OH)}_2@De$ , (b)  $\text{Ni}_x\text{S}_y@De$ .

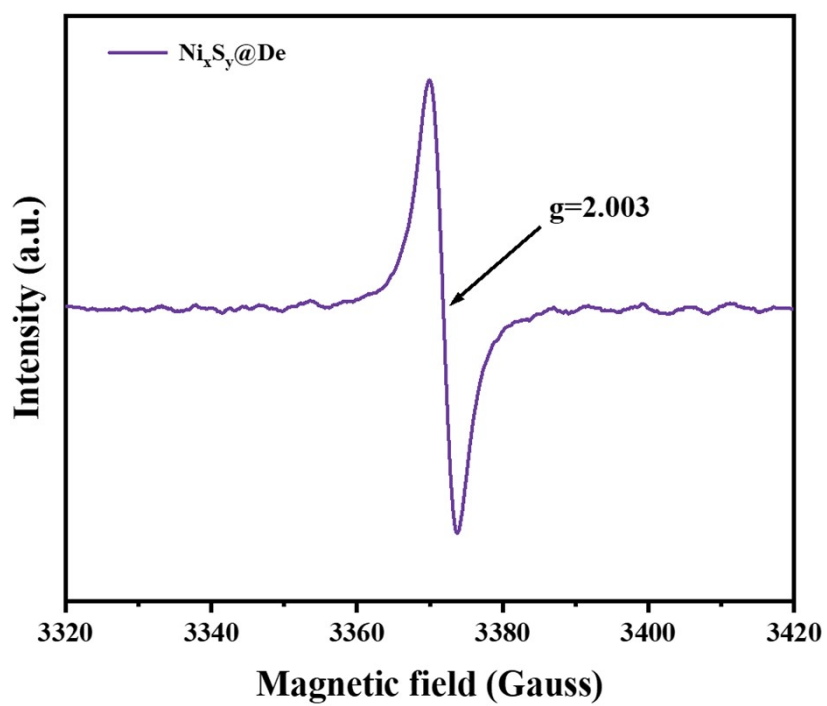

**Figure S2.** EPR spectra of  $\text{Ni}_x\text{S}_y@De$ .

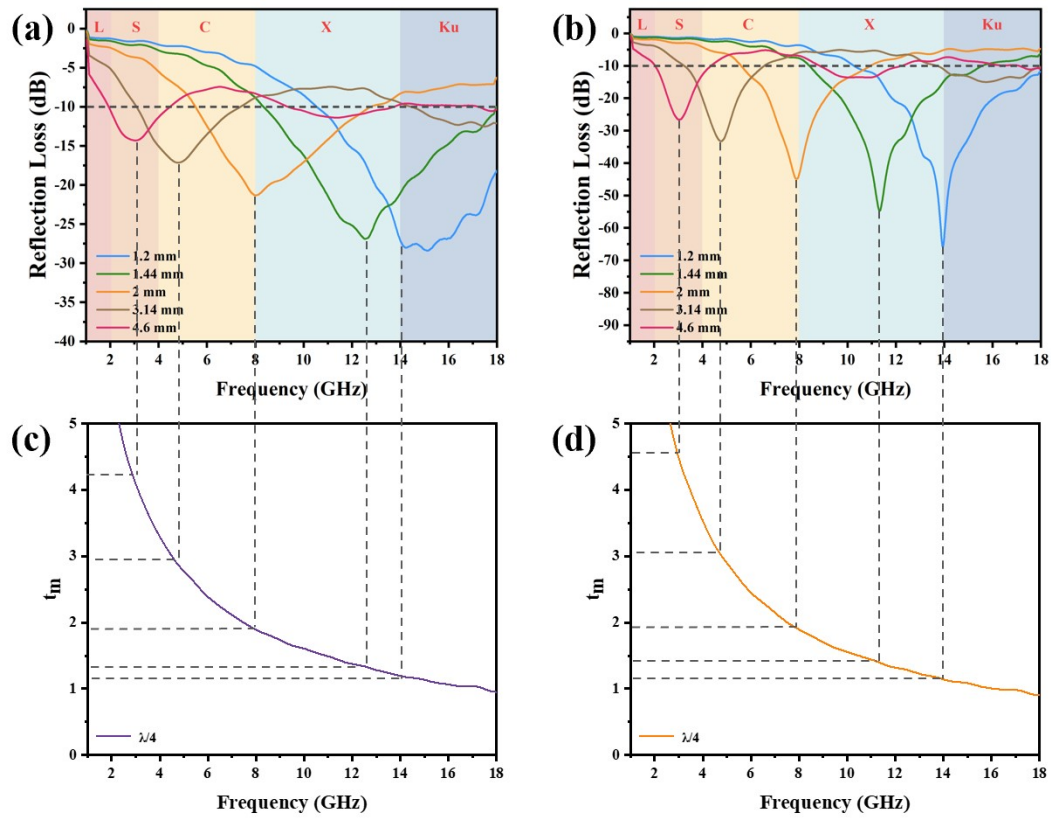

**Figure S3.** The frequency-loss 1D diagram of (a)  $\text{Ni}_x\text{S}_y@\text{De}$ , (b)  $\text{Ni}_x\text{S}_y@\text{De}$ -etched. The quarter wavelength diagram of (c)  $\text{Ni}_x\text{S}_y@\text{De}$ , (d)  $\text{Ni}_x\text{S}_y@\text{De}$ -etched.

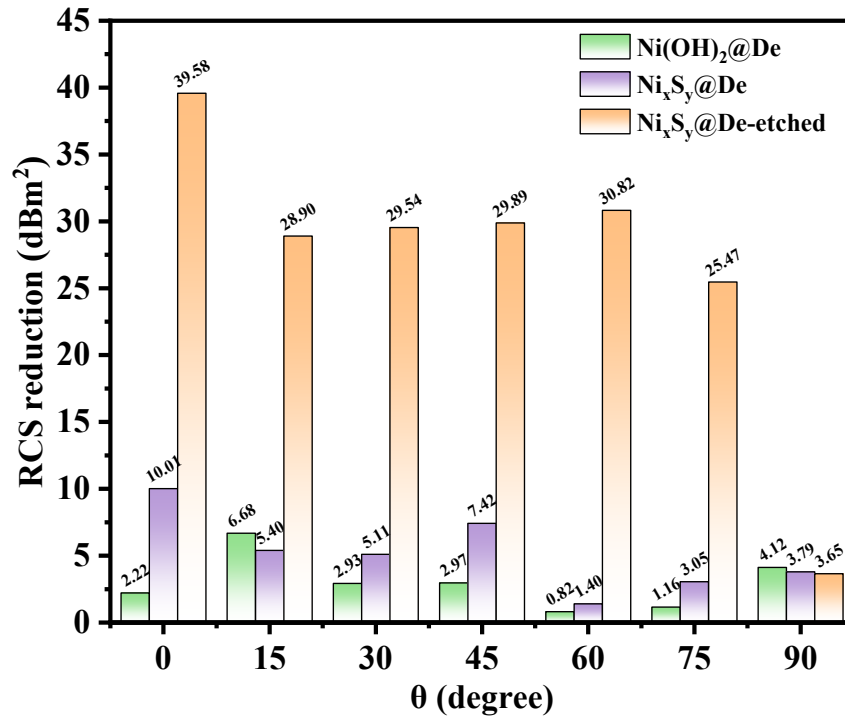

**Figure S4.** RCS reduction values of  $\text{Ni}(\text{OH})_2@\text{De}$ ,  $\text{Ni}_x\text{S}_y@\text{De}$ , and  $\text{Ni}_x\text{S}_y@\text{De}$ -etched.
